# Supplementary material
Source: MDPI journal article supplement (https://www.mdpi.com/2311-7524/8/9/823)
Supplement: s1 [file s1]

## Supplementary files

**Table S1:** Overview of pH changes of the medium at the start and the end (day 92) of experiment 3

| Treatment                   | NaHCO <sub>3</sub><br>(mM) | CaCl <sub>2</sub> ·2H <sub>2</sub> O<br>(mM) | pH    |                          |                    |                      |
|-----------------------------|----------------------------|----------------------------------------------|-------|--------------------------|--------------------|----------------------|
|                             |                            |                                              | Day 0 | Day 92 (Mean ± SE)       |                    |                      |
|                             |                            |                                              |       | <i>R. chihsinianum</i>   | <i>R. fortunei</i> | <i>R. vernicosum</i> |
| Acidic                      | 0                          | 0                                            | 5.6   | 4.3 ± 0.26 <sup>NS</sup> | 4.4 ± 0.04         | 4.5 ± 0.03           |
| Neutral                     | 2                          | 0                                            | 6.8   | 5.7 ± 0.07a              | 5.3 ± 0.08b        | 5.8 ± 0.05a          |
| Alkaline                    | 10                         | 0                                            | 8.0   | 7.1 ± 0.11a              | 6.8 ± 0.08b        | 7.3 ± 0.06a          |
| Acidic + Ca <sup>2+</sup>   | 0                          | 3.4                                          | 5.6   | 4.2 ± 0.29 <sup>NS</sup> | 4.4 ± 0.03         | 4.7 ± 0.05           |
| Neutral + Ca <sup>2+</sup>  | 2                          | 3.4                                          | 6.7   | 5.2 ± 0.03a              | 5.1 ± 0.05b        | 5.5 ± 0.07a          |
| Alkaline + Ca <sup>2+</sup> | 10                         | 3.4                                          | 7.8   | 6.7 ± 0.03a              | 6.4 ± 0.03b        | 6.7 ± 0.08ab         |

a, b significant different pH between species, NS: not significantly different – Tukey's HSD. Adding calcium did not affect the pH for any of the species ( $p > 0.05$ )

**Table S2.** Effects of pH and additional 3.4 mM Ca<sup>2+</sup> on maximum germination (g<sub>MAX</sub>), mean germination time (MGT), the time between 25% and 75% germination (uniformity) (day 41), percentage of seedlings with open cotyledons (CO) and abnormal cotyledons (AL) (day 61), percentage of seedlings with true leaves (TL) and seedling mortality (day 92), F<sub>v</sub>/F<sub>m</sub> and ΦPSII on day 41 and day 61 of *R. chihsinianum*, *R. fortunei* and *R. vernicosum*. All values are Mean ± SE.

|                 |                  | g <sub>MAX</sub><br>(%) | MGT<br>(Day) | Uniformity<br>(Day) | CO<br>(%)  | AL<br>(%)    | TL<br>(%)  | Mortality<br>(%) | F <sub>v</sub> /F <sub>m</sub> |                 | ΦPSII           |                 |
|-----------------|------------------|-------------------------|--------------|---------------------|------------|--------------|------------|------------------|--------------------------------|-----------------|-----------------|-----------------|
|                 |                  |                         |              |                     |            |              |            |                  | Day 41                         | Day 61          | Day 41          | Day 61          |
| R. chihsinianum | pH               |                         |              |                     |            |              |            |                  |                                |                 |                 |                 |
|                 | Acidic           | 35.5 ± 4.8              | 20.9 ± 0.5   | 6.6 ± 0.8           | 97.3 ± 3.3 | 7.1 ± 2.8 b  | 71.6 ± 6.6 | 13.6 ± 3.8 b     | 0.664 ± 0.005 a                | 0.631 ± 0.010 a | 0.450 ± 0.003 a | 0.415 ± 0.009   |
|                 | Neutral          | 33.7 ± 4.6              | 21.2 ± 0.5   | 7.4 ± 1.3           | 98.4 ± 1.6 | 3.4 ± 2.2 b  | 71.2 ± 6.6 | 10.2 ± 3.3 b     | 0.655 ± 0.010 a                | 0.635 ± 0.016 a | 0.412 ± 0.008 b | 0.403 ± 0.011   |
|                 | Alkaline         | 29.0 ± 4.1              | 22.0 ± 1.1   | 6.1 ± 1.3           | 91.7 ± 5.3 | 41.1 ± 9.9 a | 42.5 ± 7.8 | 39.7 ± 8.1 a     | 0.593 ± 0.044 b                | 0.545 ± 0.027 b | 0.394 ± 0.021 c | 0.377 ± 0.015   |
|                 | Ca <sup>2+</sup> |                         |              |                     |            |              |            |                  |                                |                 |                 |                 |
|                 | 0                | 29.6 ± 3.3              | 21.0 ± 0.5   | 6.8 ± 0.9           | 98.4 ± 2.6 | 13.9 ± 7.4   | 68.5 ± 7.0 | 16.8 ± 6.3       | 0.636 ± 0.021                  | 0.619 ± 0.021   | 0.424 ± 0.012   | 0.409 ± 0.011   |
|                 | 3.4 mM           | 37.8 ± 4.1              | 21.5 ± 0.6   | 6.8 ± 0.9           | 94.4 ± 2.6 | 11.7 ± 3.7   | 61.8 ± 6.5 | 19.0 ± 3.5       | 0.656 ± 0.006                  | 0.608 ± 0.011   | 0.424 ± 0.009   | 0.395 ± 0.008   |
|                 | Anova            |                         |              |                     |            |              |            |                  |                                |                 |                 |                 |
|                 | pH               | ns                      | ns           | ns                  | ns         | ***          | ns         | ***              | ***                            | ***             | ***             | ns              |
|                 | Ca <sup>2+</sup> | ns                      | ns           | ns                  | ns         | ns           | ns         | ns               | **                             | ns              | ns              | ns              |
|                 | Interaction      | ns                      | ns           | ns                  | ns         | *            | ns         | **               | ***                            | **              | ***             | ns              |
| R. fortunei     | pH               |                         |              |                     |            |              |            |                  |                                |                 |                 |                 |
|                 | Acidic           | 69.6 ± 3.4              | 21.6 ± 0.4   | 6.8 ± 0.5           | 97.9 ± 2.1 | 3.0 ± 1.4 b  | 65.3 ± 4.2 | 3.4 ± 0.9 b      | 0.685 ± 0.006 a                | 0.675 ± 0.004 a | 0.448 ± 0.003 a | 0.449 ± 0.004 a |
|                 | Neutral          | 73.2 ± 4.5              | 21.1 ± 0.4   | 6.2 ± 0.4           | 99.7 ± 2.4 | 0.7 ± 0.7 b  | 64.5 ± 3.3 | 2.5 ± 1.1 b      | 0.689 ± 0.002 a                | 0.667 ± 0.004 a | 0.416 ± 0.002 b | 0.417 ± 0.004 b |
|                 | Alkaline         | 68.4 ± 3.7              | 21.9 ± 0.5   | 5.8 ± 0.4           | 100 ± 2.0  | 29.2 ± 8.5 a | 70.8 ± 6.9 | 28.2 ± 9.0 a     | 0.602 ± 0.018 b                | 0.589 ± 0.018 b | 0.387 ± 0.006 c | 0.387 ± 0.012 b |

|               |             |            |            |           |             |              |            |              |                 |                 |                 |                 |
|---------------|-------------|------------|------------|-----------|-------------|--------------|------------|--------------|-----------------|-----------------|-----------------|-----------------|
| R. vermicosum | Ca2+        |            |            |           |             |              |            |              |                 |                 |                 |                 |
|               | 0           | 65.6 ± 3.4 | 21.9 ± 0.4 | 7.0 ± 0.4 | 100.3 ± 2.1 | 18.9 ± 6.8   | 65.4 ± 4.3 | 19.5 ± 6.7   | 0.638 ± 0.017   | 0.633 ± 0.016   | 0.412 ± 0.008   | 0.413 ± 0.009   |
|               | 3.4 mM      | 75.2 ± 2.2 | 21.2 ± 0.3 | 5.6 ± 0.3 | 98.1 ± 1.2  | 3.0 ± 1.1    | 68.2 ± 3.9 | 3.2 ± 0.9    | 0.679 ± 0.007   | 0.654 ± 0.009   | 0.422 ± 0.006   | 0.422 ± 0.009   |
|               | Anova       |            |            |           |             |              |            |              |                 |                 |                 |                 |
|               | pH          | ns         | ns         | ns        | ns          | ***          | ns         | ***          | ***             | ***             | ***             | ***             |
|               | Ca2+        | *          | ns         | **        | ns          | ***          | ns         | ***          | ***             | ns              | ns              | ns              |
|               | Interaction | ns         | ns         | *         | ns          | ***          | **         | ***          | **              | ns              | ns              | ns              |
|               | pH          |            |            |           |             |              |            |              |                 |                 |                 |                 |
|               | Acidic      | 38.0 ± 3.0 | 21.5 ± 0.7 | 7.9 ± 0.9 | 90.7 ± 4.0  | 4.2 ± 2.4 b  | 49.0 ± 3.3 | 8.9 ± 2.8 b  | 0.638 ± 0.006 a | 0.658 ± 0.005 a | 0.405 ± 0.006 a | 0.418 ± 0.005 a |
|               | Neutral     | 36.0 ± 3.1 | 21.0 ± 0.6 | 6.5 ± 1.1 | 91.5 ± 2.5  | 10.7 ± 3.6 b | 58.9 ± 3.0 | 17.8 ± 4.9 b | 0.637 ± 0.005 a | 0.654 ± 0.008 a | 0.383 ± 0.003 b | 0.391 ± 0.007 b |
|               | Alkaline    | 34.8 ± 3.4 | 21.0 ± 0.5 | 7.0 ± 0.7 | 93.0 ± 3.9  | 50.8 ± 5.1 a | 50.5 ± 8.3 | 53.6 ± 7.2 a | 0.530 ± 0.019 b | 0.502 ± 0.021 b | 0.34 ± 0.008 c  | 0.331 ± 0.008 c |
|               | Ca2+        |            |            |           |             |              |            |              |                 |                 |                 |                 |
|               | 0           | 39.2 ± 2.3 | 22.5 ± 0.4 | 7.8 ± 0.5 | 94.3 ± 2.8  | 23.4 ± 7.8   | 51.4 ± 4.4 | 29.0 ± 8.4   | 0.590 ± 0.020   | 0.603 ± 0.026   | 0.377 ± 0.01    | 0.387 ± 0.012   |
|               | 3.4mM       | 33.3 ± 2.6 | 19.9 ± 0.3 | 6.5 ± 0.9 | 89.2 ± 2.7  | 20.4 ± 4.3   | 54.2 ± 4.6 | 24.5 ± 4.1   | 0.613 ± 0.011   | 0.606 ± 0.017   | 0.375 ± 0.007   | 0.373 ± 0.009   |
|               | Anova       |            |            |           |             |              |            |              |                 |                 |                 |                 |
|               | pH          | ns         | ns         | ns        | ns          | ***          | ns         | ***          | ***             | ***             | ***             | ***             |
|               | Ca2+        | ns         | ***        | ns        | ns          | ns           | ns         | ns           | ns              | ns              | ns              | ns              |
|               | Interaction | ns         | ns         | ns        | ns          | ***          | ns         | ***          | ns              | ns              | ns              | ns              |

ns, \*, \*\*, or \*\*\* indicate non-significant or significant effects at P < 0.05, 0.01, or 0.001 according to a 2-way ANOVA or a non-parametric Kruskal-Wallis analysis (AL and mortality).

a, b denote significant differences according to Tukey's HSD test or the Mann-Whitney U test (AL and mortality) (P = 0.05).

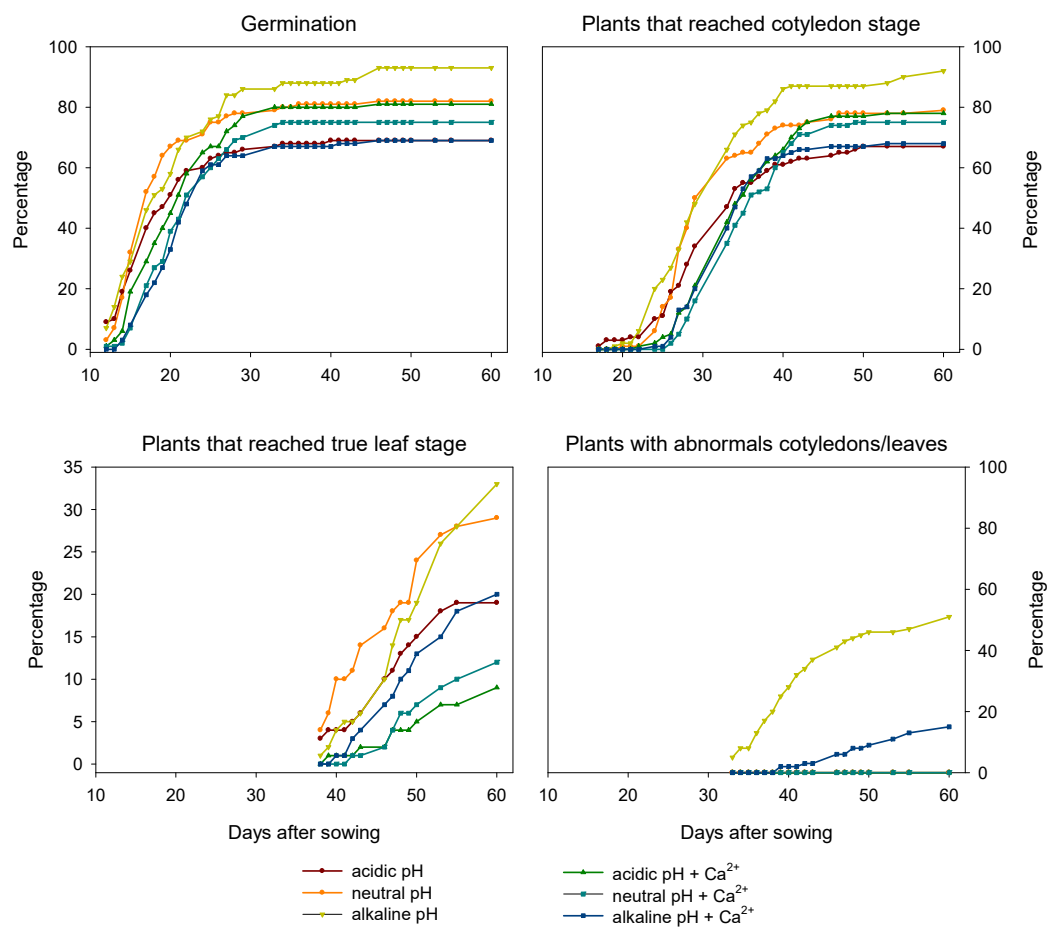

**Figure S1.** Germination percentage, development of the cotyledons, abnormal leaves and true leaves of *R. fortunei* under varying levels of pH (acidic, neutral and alkaline) without or with addition of 3.4 mM Ca<sup>2+</sup>
